# Supplementary material for: Evolution of a sex megachromosome
Source: bioRxiv or medRxiv preprint supplement (doi:10.1101/2020.07.02.182808), 2020-07-03

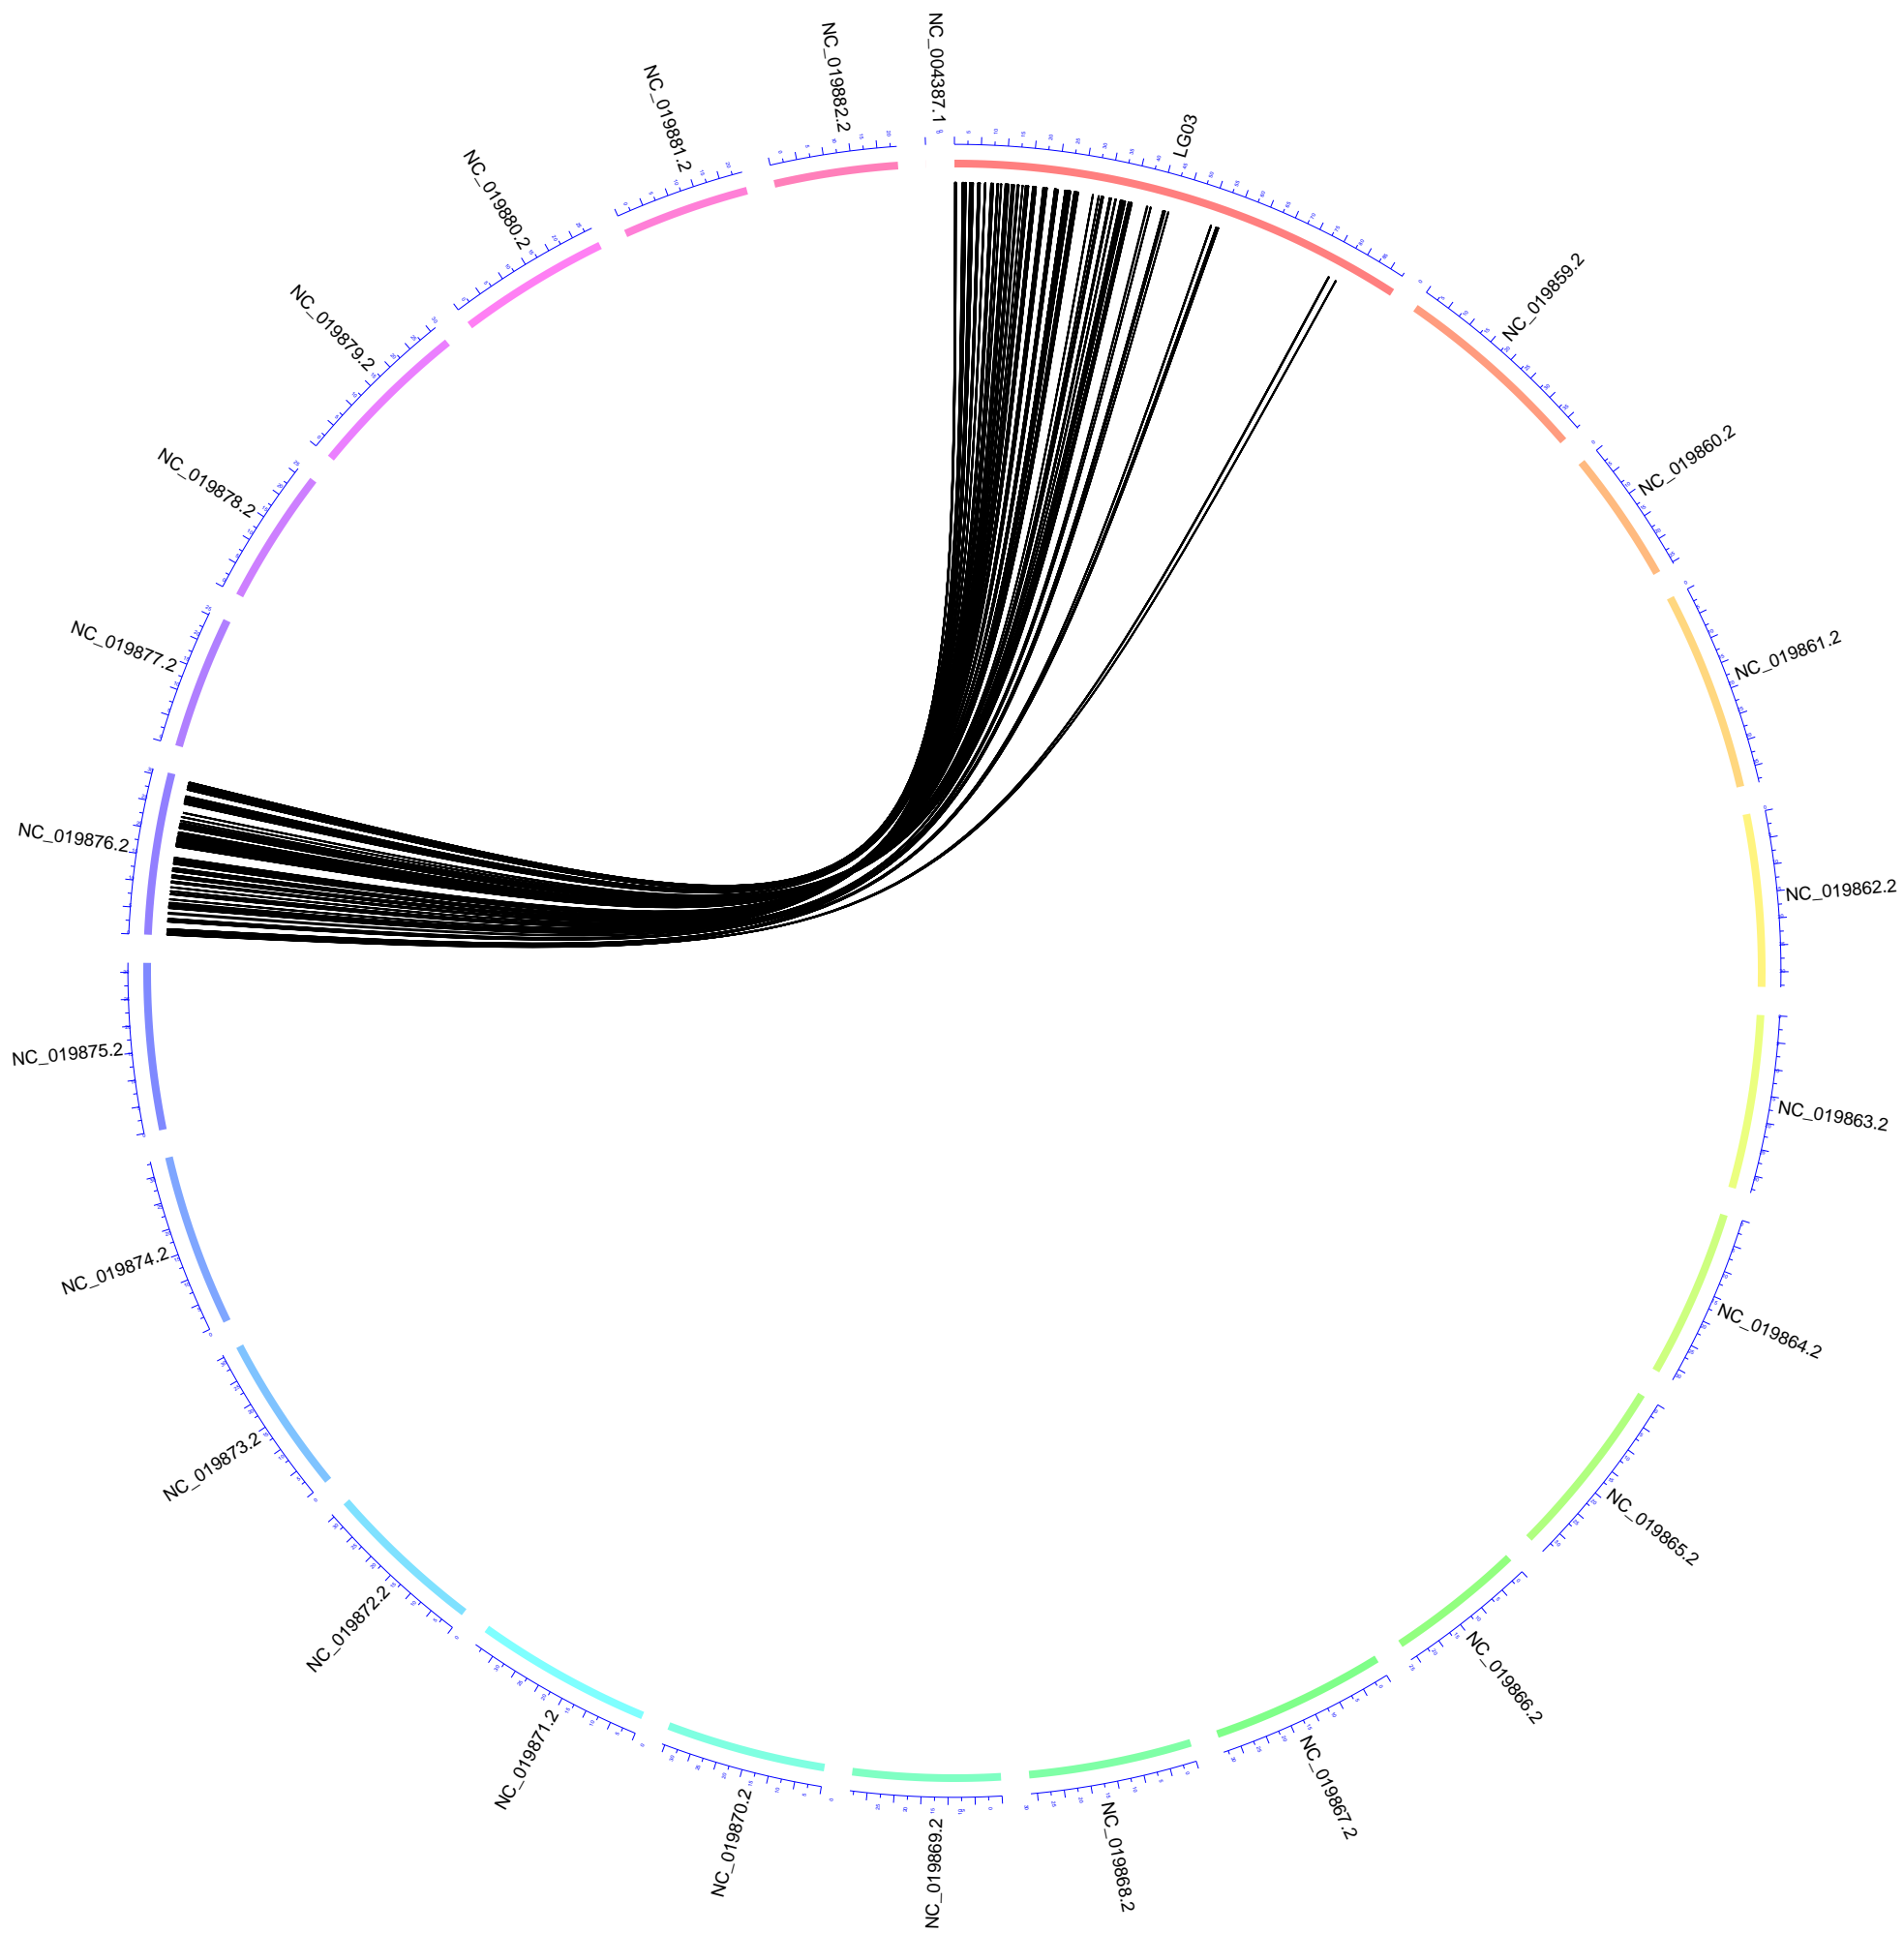

Supplement: Supplementary file [file media-5.pdf]
